# Supplementary material
Source: publisher figshare collection journal article supplement (https://acs.figshare.com/ndownloader/files/4195912)
Supplement: Supplementary file 1 [file 4195912]

## Supplementary Information

### One-Step Formation of W/O/W Multiple Emulsions Stabilized by Single Amphiphilic Block Copolymers

Liangzhi Hong,<sup>a,\*</sup> Guanqing Sun<sup>b</sup>, Jinge Cai<sup>b</sup> and To Ngai<sup>a,b</sup>

<sup>a</sup> Faculty of Materials Science and Engineering, South China University of Technology, Guangzhou 510640, China; E-mail: mslzhong@scut.edu.cn

<sup>b</sup> Department of Chemistry, The Chinese University of Hong Kong, Shatin N.T., Hong Kong.

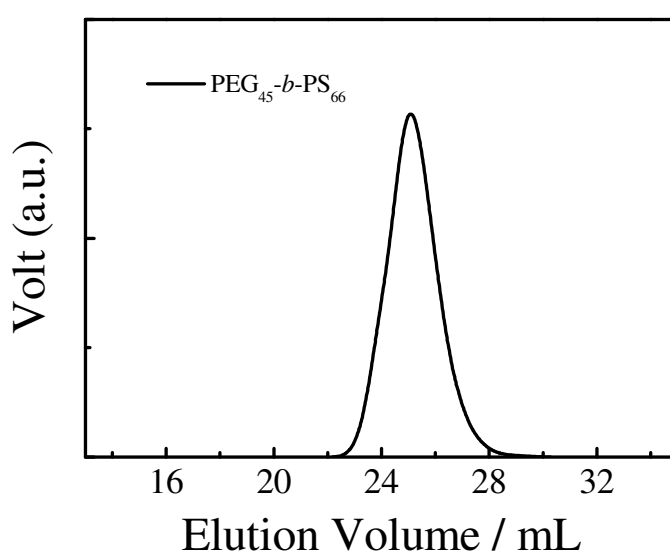

**Fig. S1.** SEC graph of PEG<sub>45</sub>-b-PS<sub>66</sub>, where THF is used as the eluent.

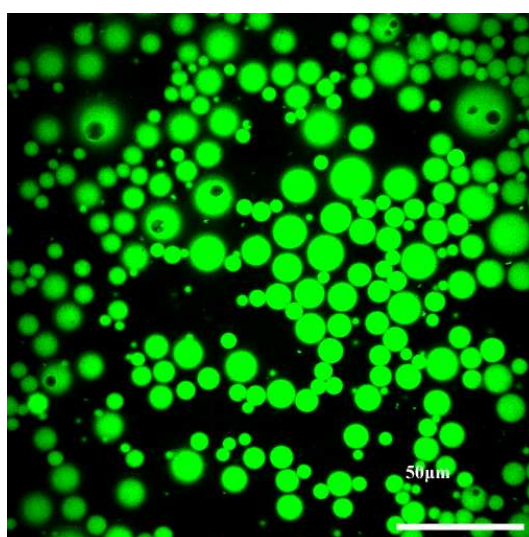

**Fig. S2.** CLSM images of copolymer-stabilized emulsions prepared by shearing a mixture containing toluene, water and PEG<sub>45</sub>-b-PS<sub>66</sub> with 20% toluene.

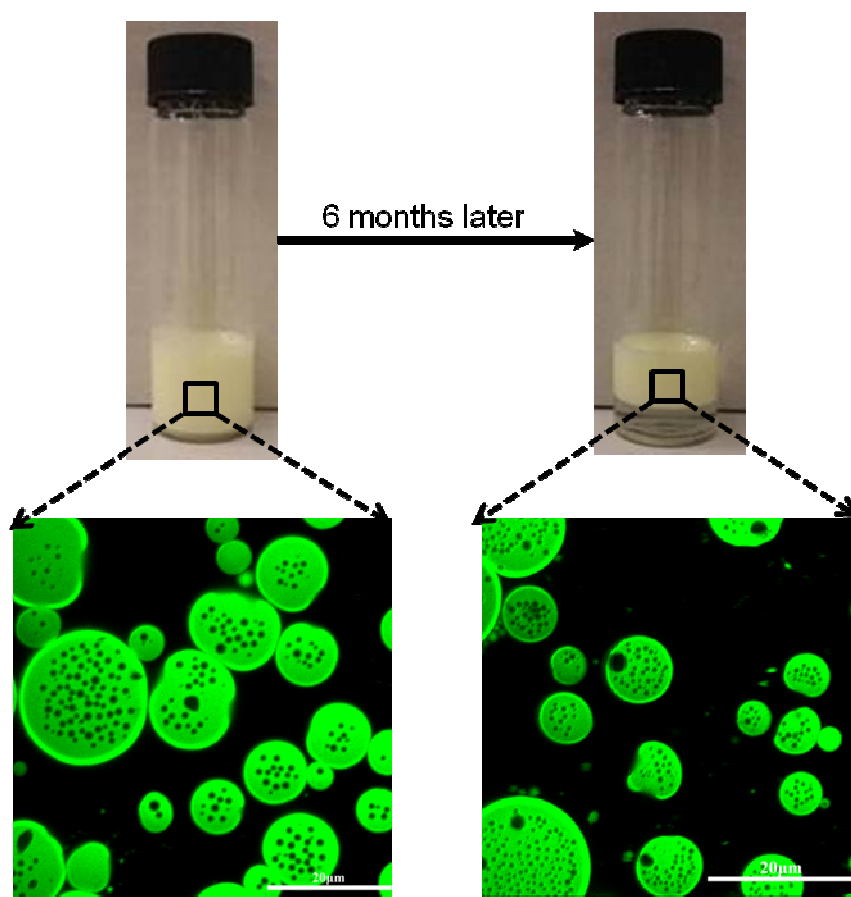

**Fig. S3.** Optical micrographs and confocal laser scanning microscopy images illustrate the stability and structure of prepared multiple emulsions prepared containing 40% toluene.
